# Supplementary material for: A general approach for producing nanoporous carbon, especially as evidenced for the case of adipic acid and zinc
Source: Royal Society of Chemistry journal article supplement (doi:10.1039/c3ta13506c), 2013-01-01
Supplement: c3ta13506c.pdf [file c3ta13506c.pdf]

## Supporting Information:

### 1. Electrochemical measurements employed in the present work.

#### ➤ Measurements conducted in a three-electrode system using 6 mol L<sup>-1</sup> KOH as electrolyte:

A mixture of 80 wt% the carbon sample (~ 4 mg), 15 wt% acetylene black and 5 wt% polytetrafluoroethylene (PTFE) binder was fabricated using ethanol as a solvent. Slurry of the above mixture was subsequently pressed onto nickel foam under a pressure of 20 MPa, serving as the current collector. The prepared electrode was placed in a vacuum drying oven at 120 °C for 24 h. A three electrode experimental setup taking a 6 mol L<sup>-1</sup> KOH aqueous solution as electrolyte was used in cyclic voltammetry and galvanostatic charge-discharge measurements on an electrochemical working station (CHI660D, ChenHua Instruments Co. Ltd., Shanghai). Here, the prepared electrode, platinum foil (6 cm<sup>2</sup>) and saturated calomel electrode (SCE) were used as the working, counter and reference electrodes, respectively.

Specific capacitances derived from galvanostatic tests can be calculated from the equation:

$$C = \frac{I\Delta t}{m\Delta V}$$

where  $C$  (F g<sup>-1</sup>) is the specific capacitance;  $I$  (A) is the discharge current;  $\Delta t$  (s) is the discharge time;  $\Delta V$  (V) is the potential window; and  $m$  (mg) is the mass of active materials loaded in working electrode.

Specific capacitances derived from cyclic voltammetry tests can be calculated from the equation:

$$C = \frac{1}{m\nu(V_b - V_a)} \int_{V_a}^{V_b} IdV$$

where  $C$  (F g<sup>-1</sup>) is the specific capacitance;  $m$  (mg) is the mass of active materials loaded in working electrode;  $\nu$  (V s<sup>-1</sup>) is the scan rate;  $I$  (A) is the discharge current;  $V_b$  and  $V_a$  (V) are high and low potential limit of the CV tests.

Specific energy density (E) and specific power density (P) derived from

galvanostatic tests can be calculated from the equations:

$$E = \frac{1}{2} C \Delta V^2$$
$$P = \frac{E}{\Delta t}$$

where  $E$  (Wh kg<sup>-1</sup>) is the average energy density;  $C$  (F g<sup>-1</sup>) is the specific capacitance;  $\Delta V$  (V) is the potential window;  $P$  (W kg<sup>-1</sup>) is the average power density and  $\Delta t$  (s) is the discharge time.

➤ **Measurements conducted in a two-electrode system using [EMIm]BF<sub>4</sub>/AN as electrolyte:**

In a two-electrode cell, [EMIm]BF<sub>4</sub> and acetonitrile (AN) (weight ratio of 1:1) was adopted as electrolyte. A glassy paper separator was sandwiched between two electrodes, and each electrode contains a mixture of 80 wt% the carbon sample (~ 2 mg), 15 wt% acetylene black and 5 wt% polytetrafluoroethylene (PTFE) binder. Nickel foam serves as the current collector. The assembly of the test cell was done in a glove box filled with Ar.

Specific capacitances derived from galvanostatic tests can be calculated from the equation:

$$C = \frac{4I\Delta t}{m\Delta V}$$

where  $C$  (F g<sup>-1</sup>) is the specific capacitance;  $I$  (A) is the discharge current;  $\Delta t$  (s) is the discharge time;  $\Delta V$  (V) is the potential window; and  $m$  (mg) is the total mass of two electrodes.

Specific capacitances derived from cyclic voltammetry tests can be calculated from the equation:

$$C = \frac{2}{m\nu(V_b - V_a)} \int_{V_a}^{V_b} IdV$$

where  $C$  (F g<sup>-1</sup>) is the specific capacitance;  $m$  (mg) is the mass of active materials loaded in working electrode;  $\nu$  (V s<sup>-1</sup>) is the scan rate;  $I$  (A) is the discharge current;  $V_b$

and  $V_a$  (V) are high and low potential limit of the CV tests.

Specific energy density ( $E$ ) and specific power density ( $P$ ) derived from galvanostatic tests can be calculated from the equations:

$$E = \frac{1}{8}C\Delta V^2$$
$$P = \frac{E}{\Delta t}$$

where  $E$  (Wh kg<sup>-1</sup>) is the average energy density;  $C$  (F g<sup>-1</sup>) is the specific capacitance;  $\Delta V$  (V) is the potential window;  $P$  (W kg<sup>-1</sup>) is the average power density and  $\Delta t$  (s) is the discharge time.

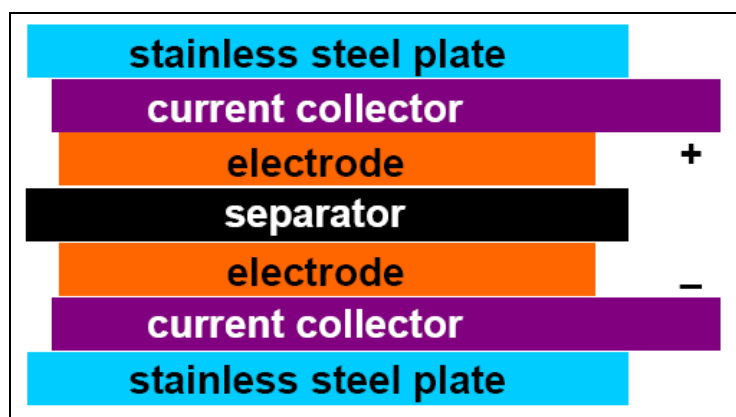

**Fig. S1.** Schematic illustration of a supercapacitor cell.

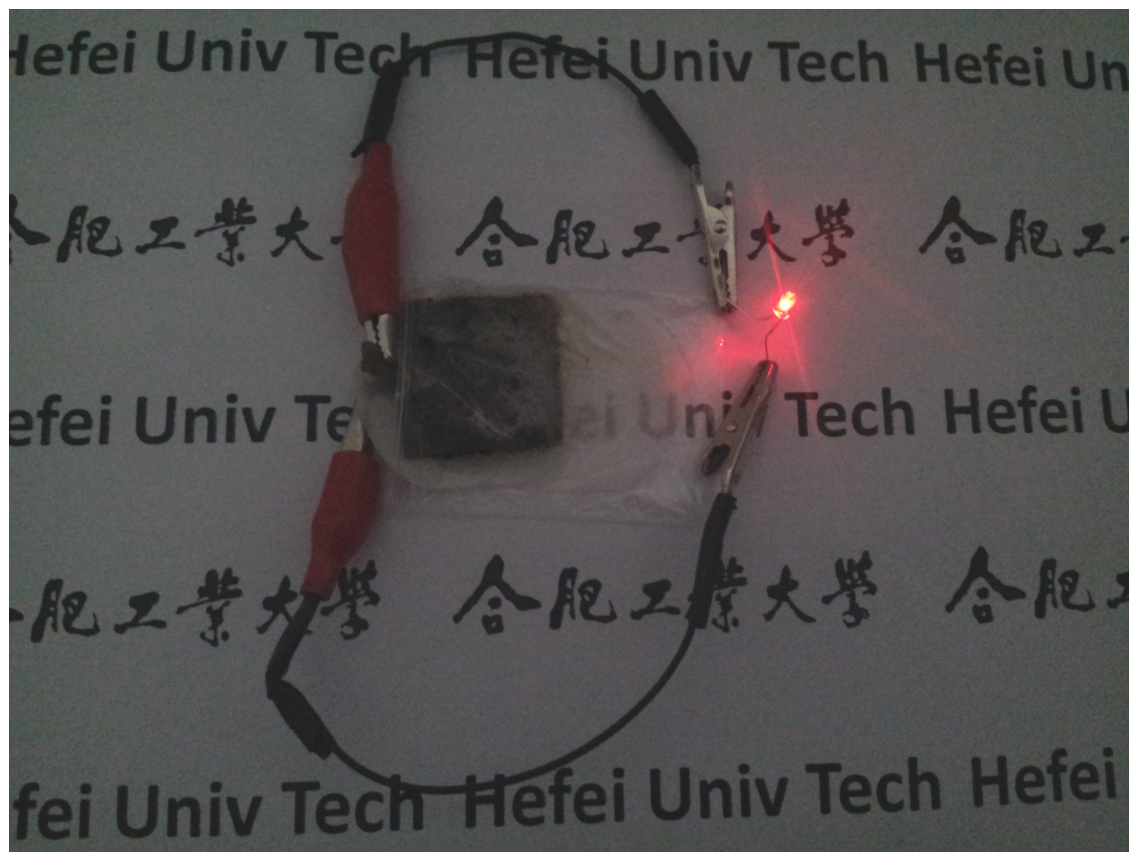

**Fig. S2.** Digital photograph of the simple supercapacitor cell that makes the red LED lamp (302UR-W) light, using the **carbon-1:2-700** sample as electrode material.

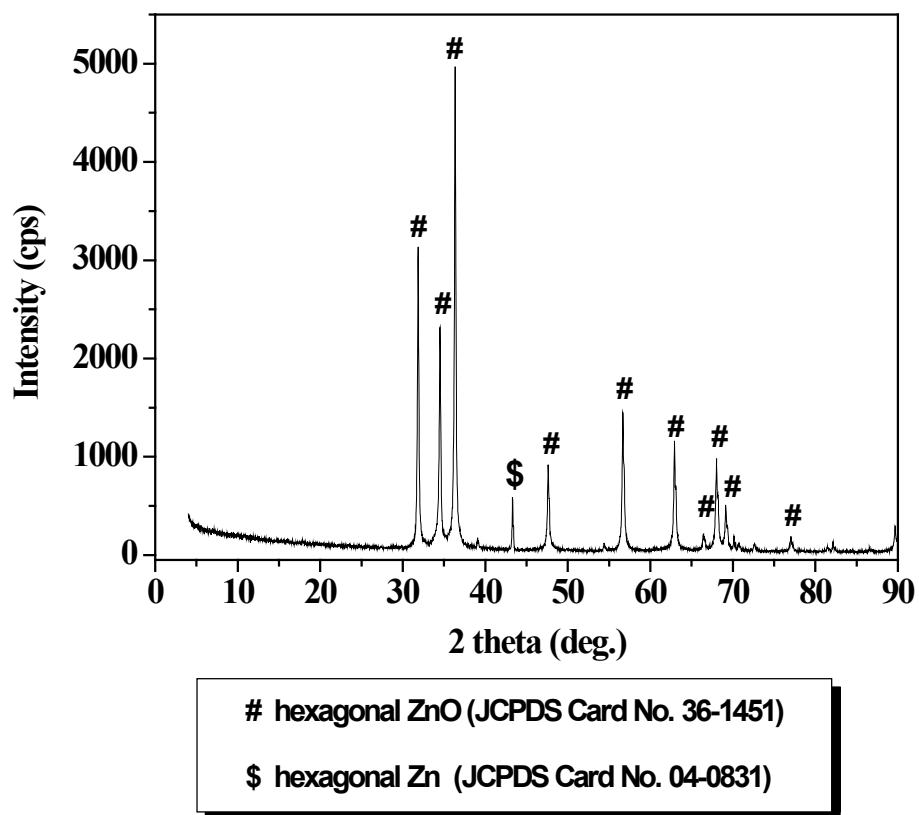

**Fig. S3.** XRD pattern of the **carbon-1:2-700** sample before washing treatment.

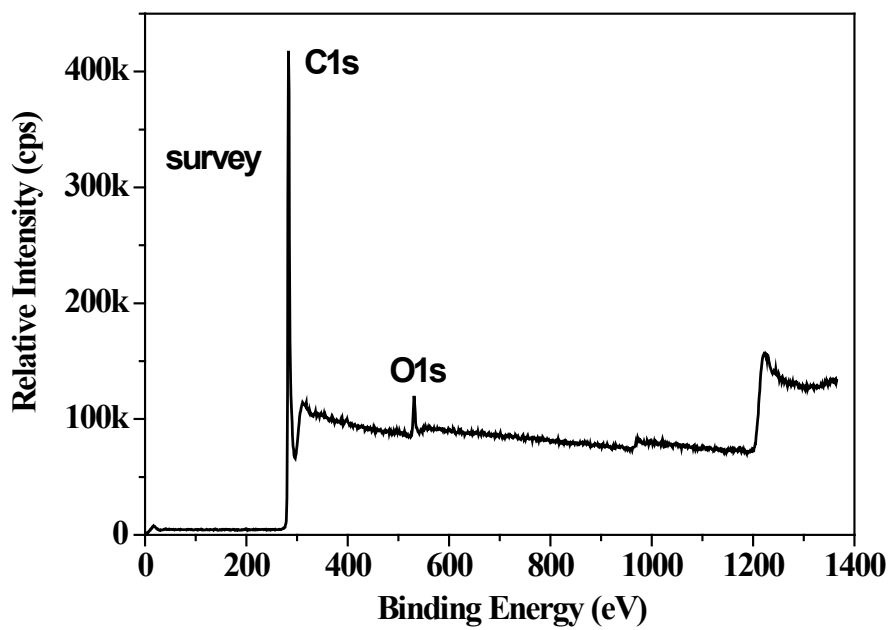

**Fig. S4.** XPS survey of the **carbon-1:2-700** sample.

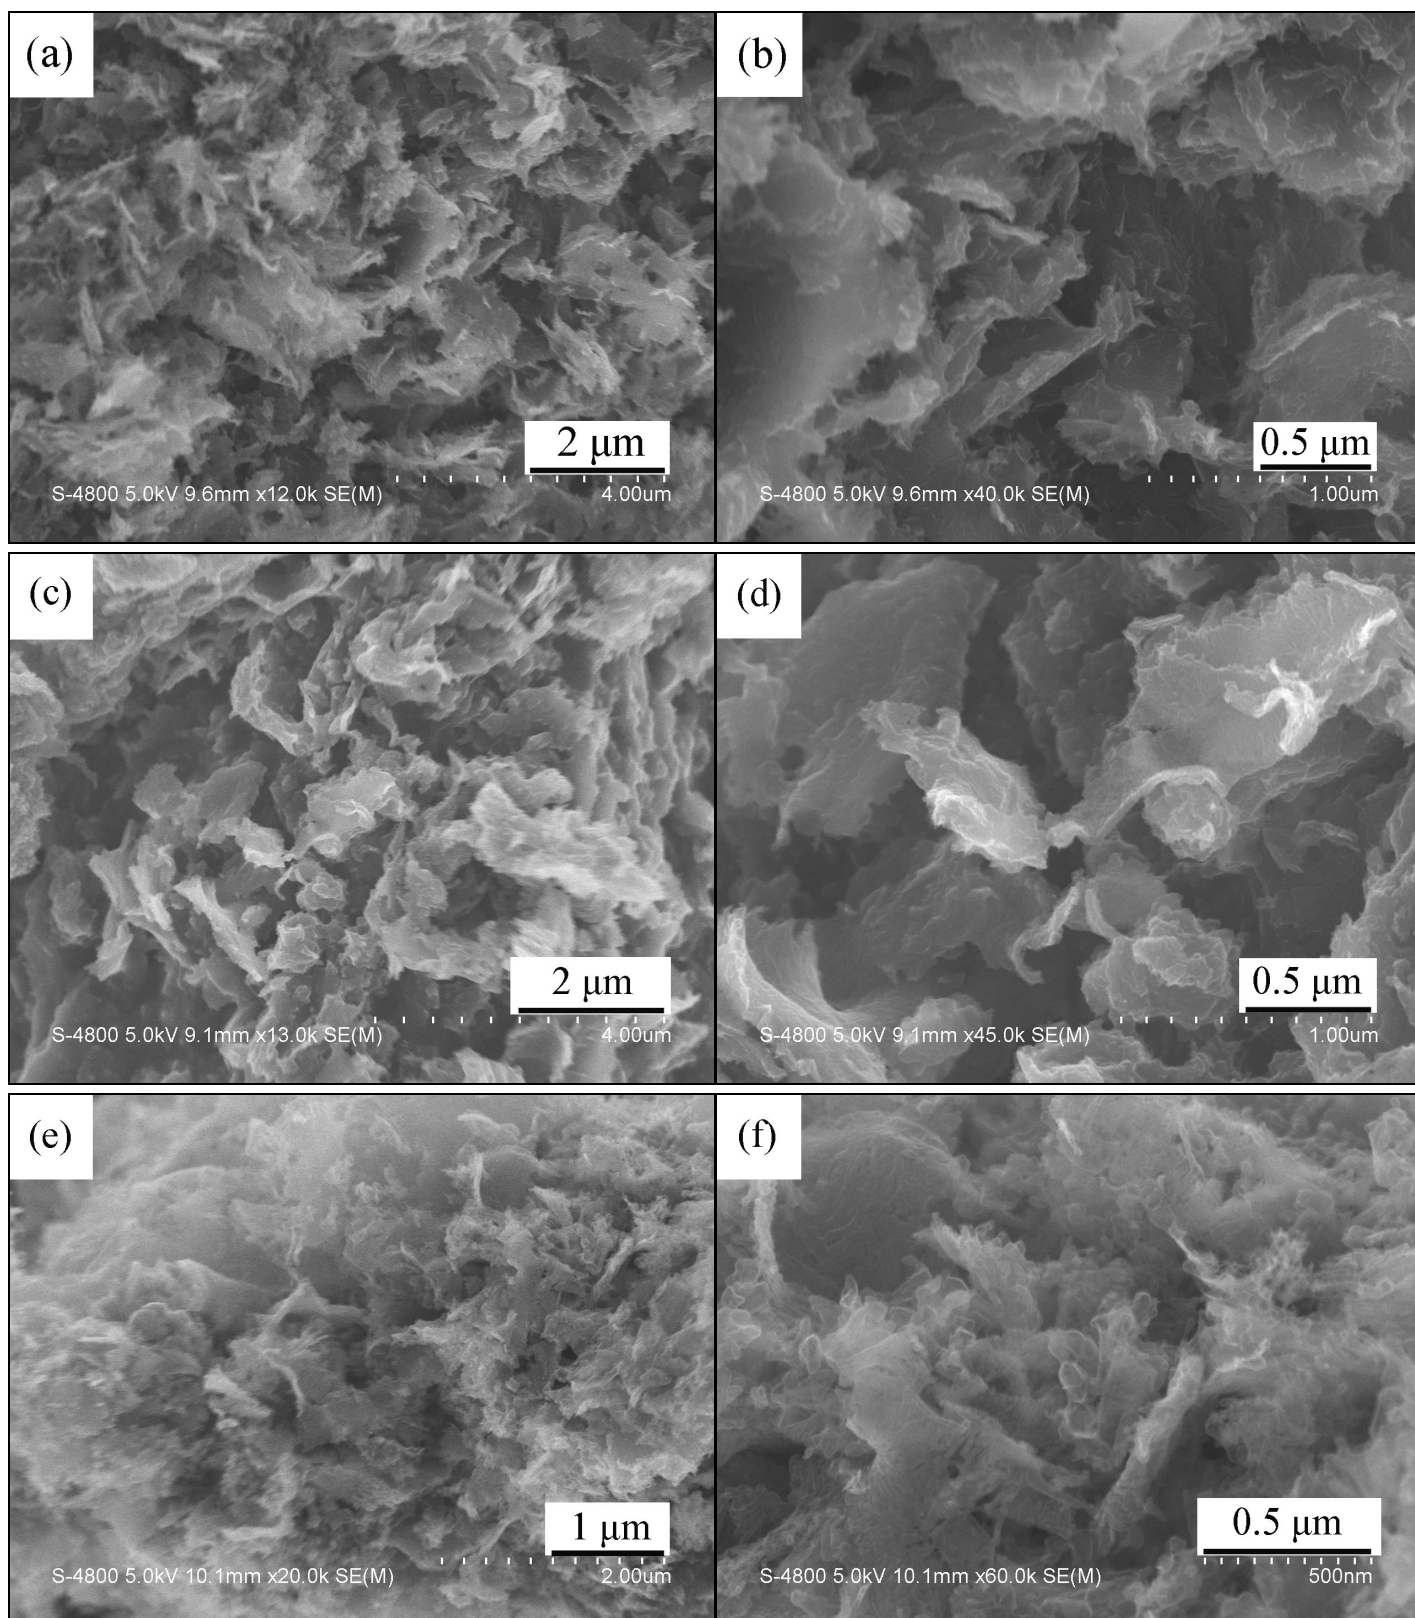



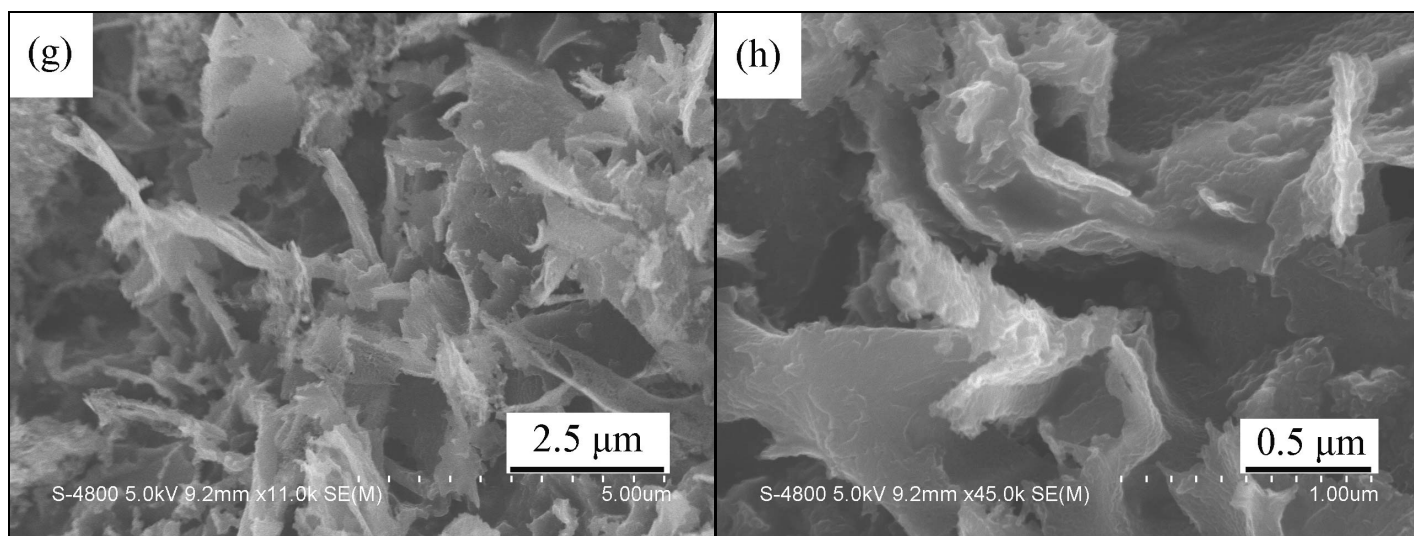

**Fig. S5.** FESEM images: (a-b) **carbon-1:2-800**; (c-d) **carbon-1:2-900**; (e-f) **carbon-1:1-900**; (g-h) **carbon-2:1-900**. *Note that all of samples use adipic acid and zinc as starting materials with different mass ratios and carbonization temperatures.*

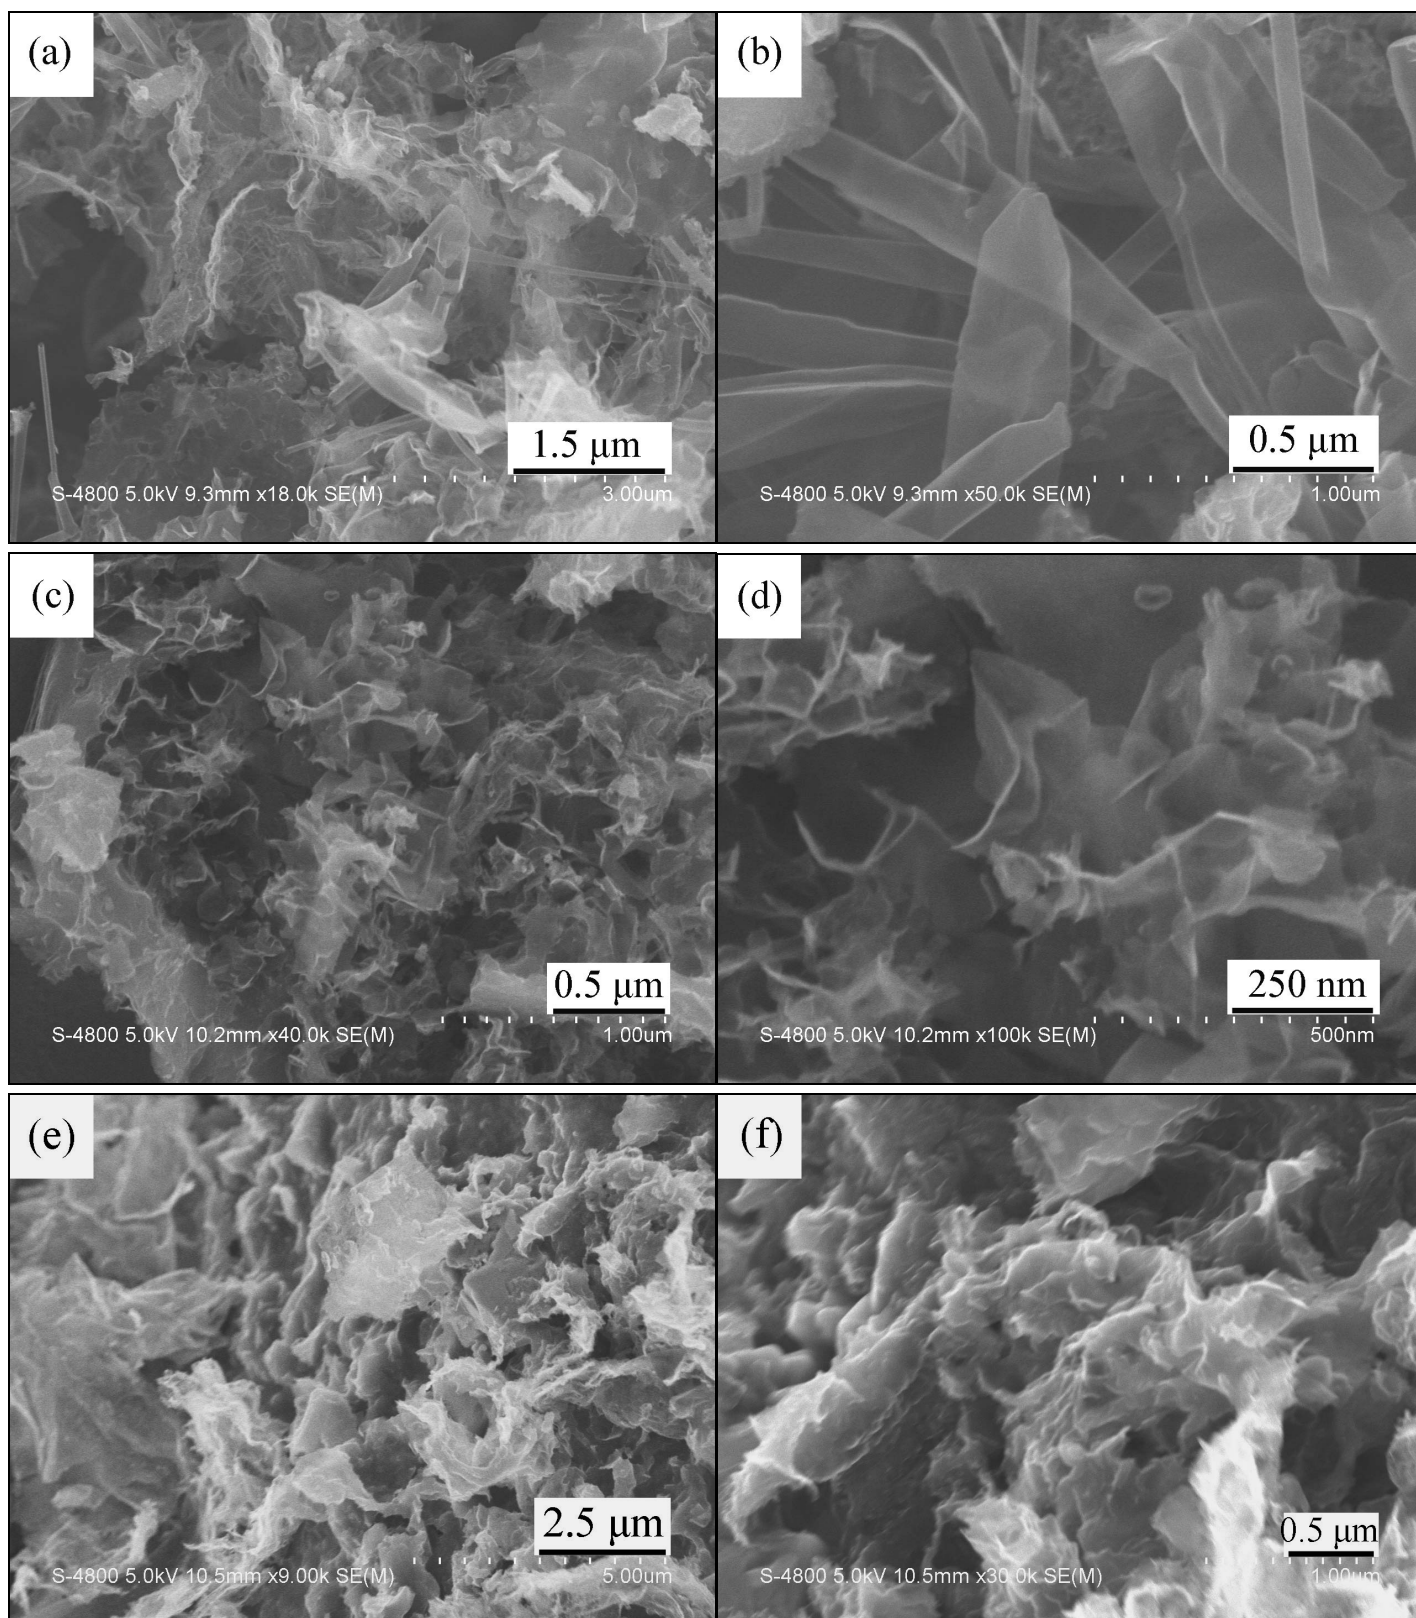

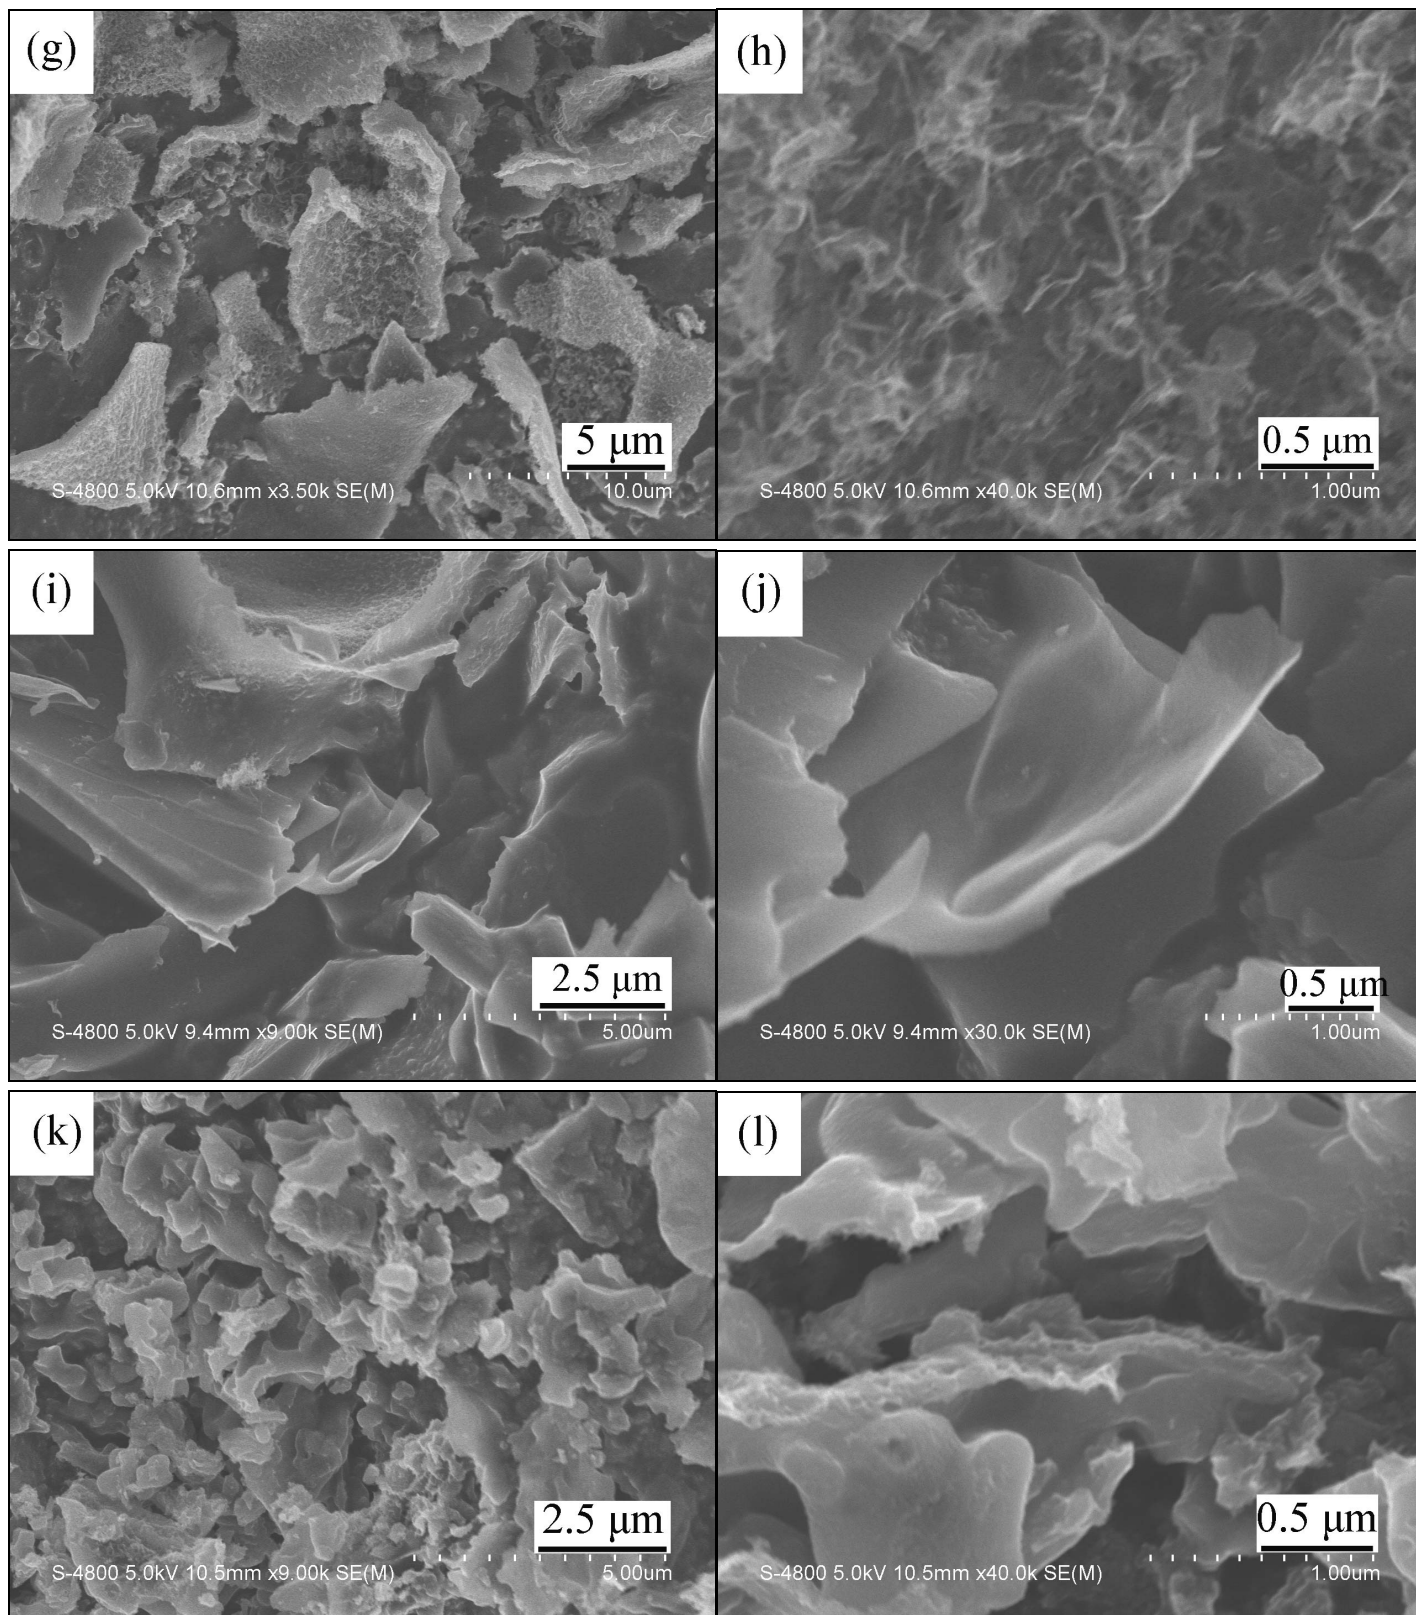

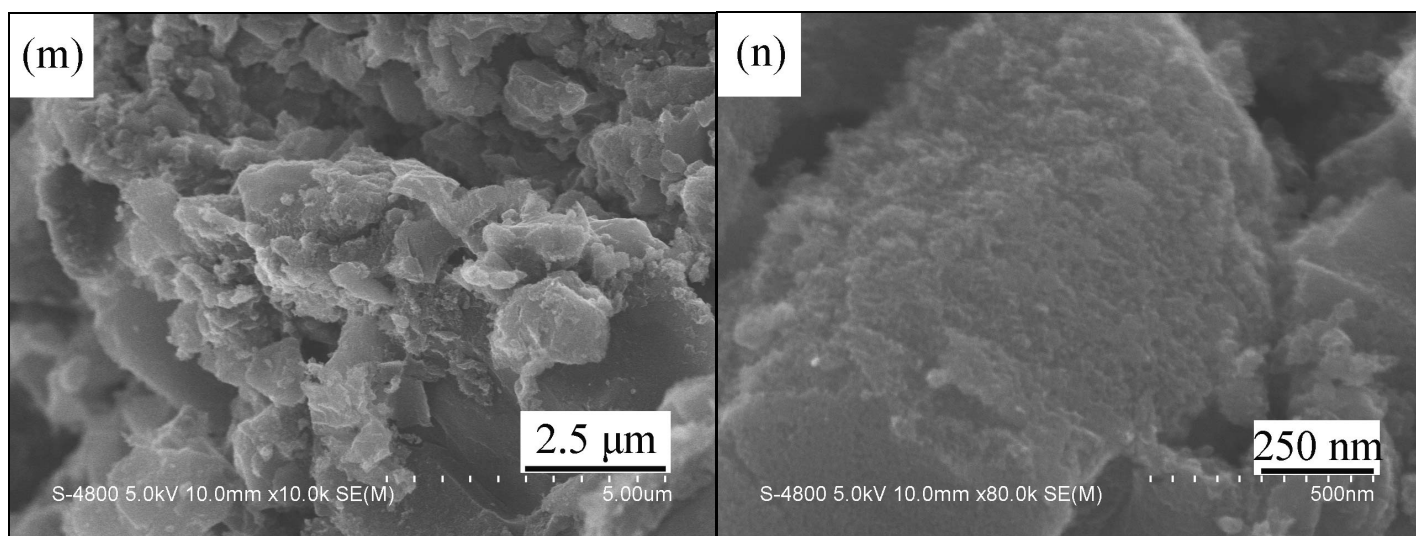

**Fig. S6.** FESEM images: (a-b) **carbon-1:1-900** (polyvinyl alcohol and zinc); (c-d) **carbon-1:1-900** (polyvinyl butyral and zinc); (e-f) **carbon-1:1-900** (diphenyl carbonate and zinc); (g-h) **carbon-1:1-900** (stearic acid and zinc); (i-j) **carbon-1:1-900** (urea formaldehyde resin and zinc); (k-l) **carbon-1:1-900** (citric acid and zinc); (m-n) **carbon-1:1-900** (magnesium citrate and zinc).

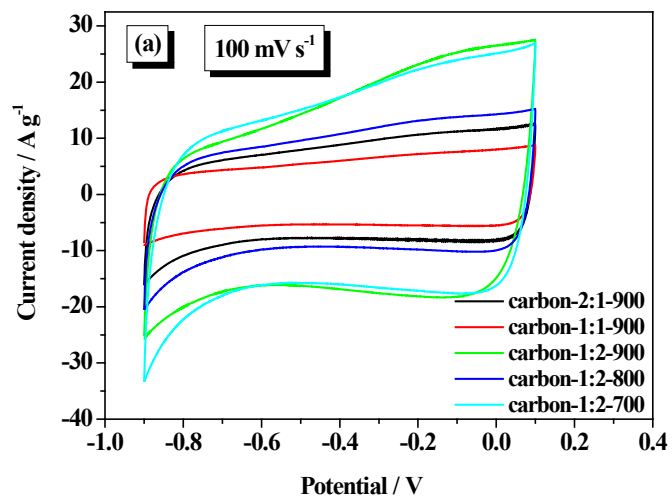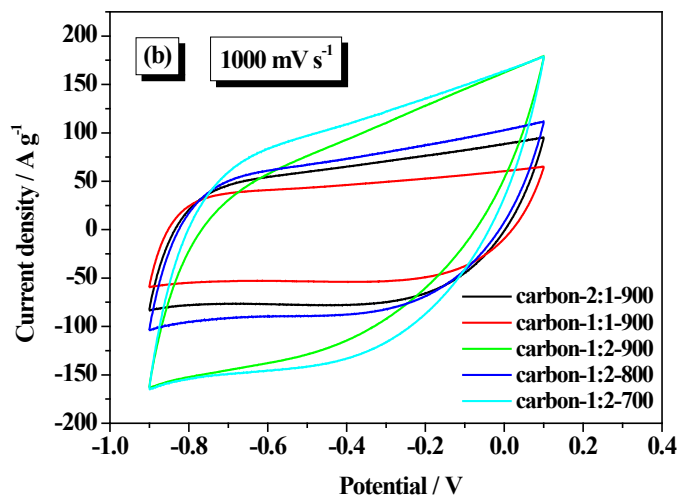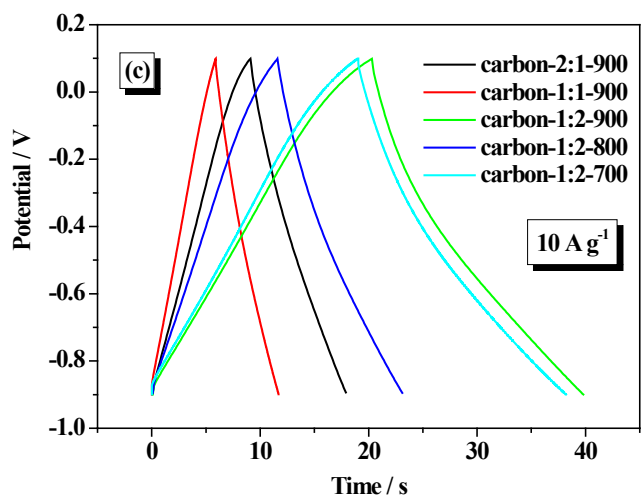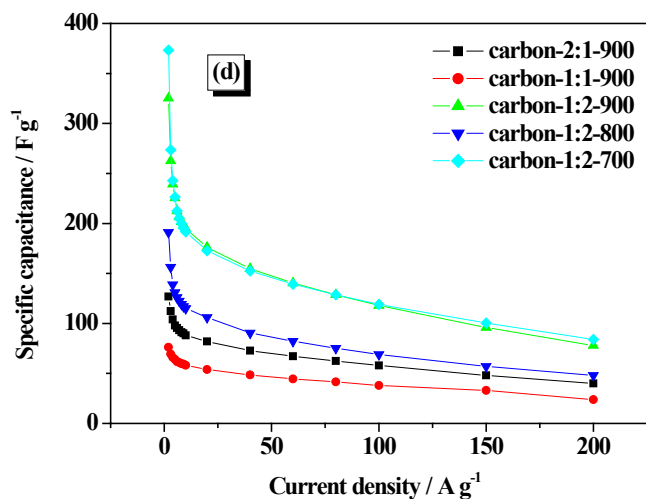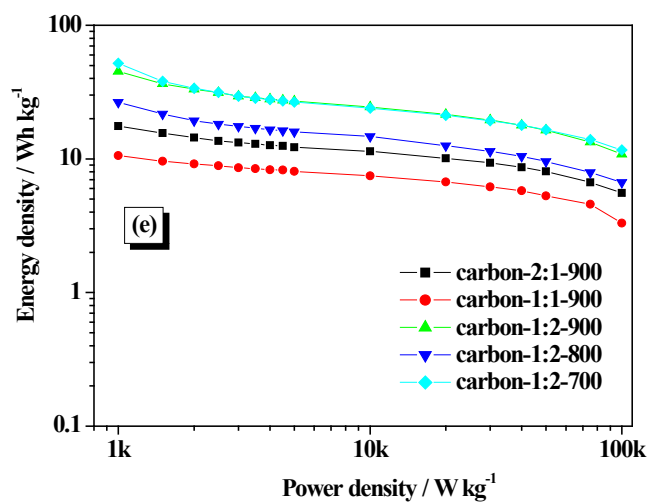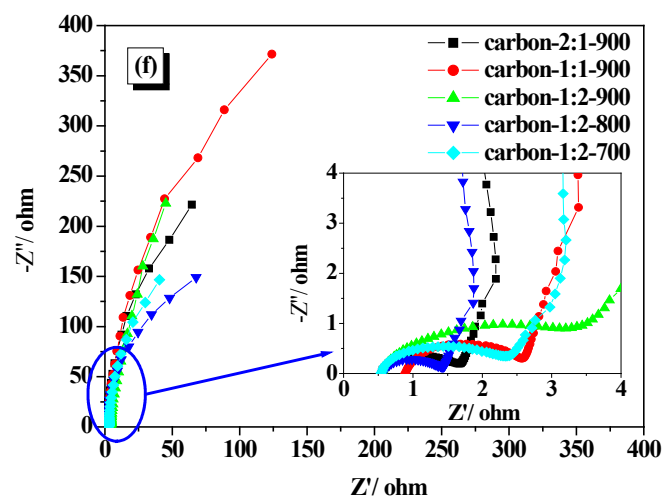

**Fig. S7.** (a) CV curves at  $100 \text{ mV s}^{-1}$ ; (b) CV curves at  $1000 \text{ mV s}^{-1}$ ; (c) galvanostatic charge-discharge curves at various current densities; (d) the calculated specific capacitances from discharging time; (e) Ragone plot showing energy density vs. power density; (f) Nyquist plots before cycling, as well as the magnified ones (the inset). *Note that all of samples use adipic acid and zinc as starting materials with different mass ratios and carbonization temperatures and they were measured in a three-electrode system using  $6 \text{ mol L}^{-1} \text{ KOH}$  as electrolyte.*

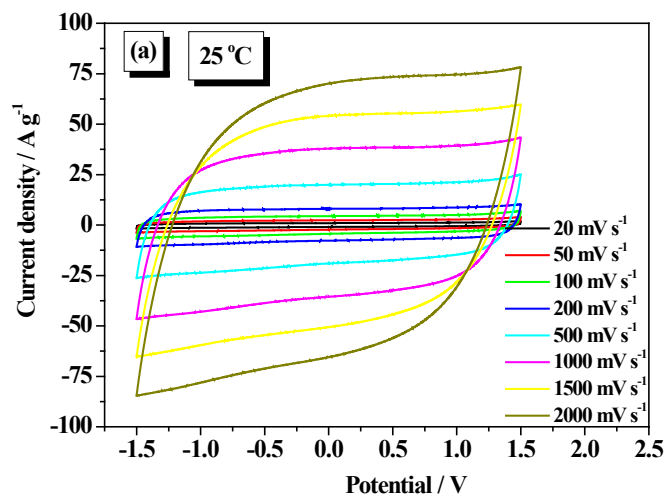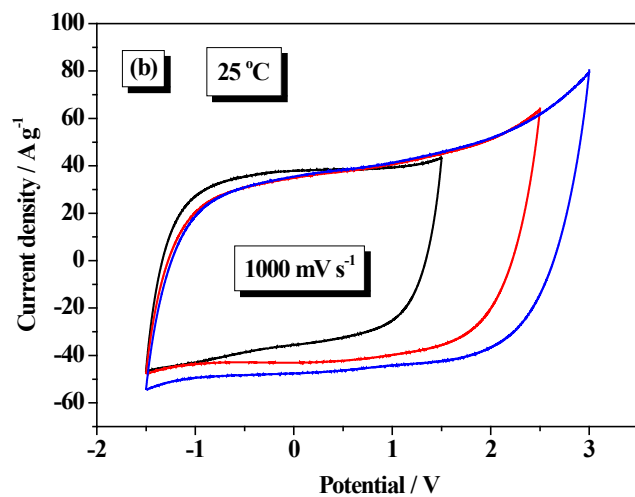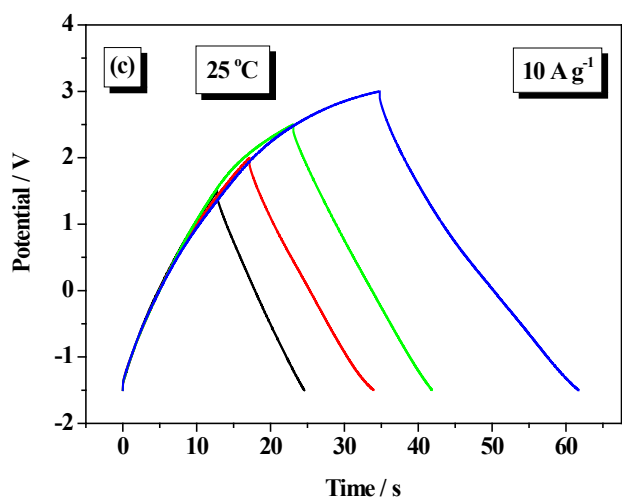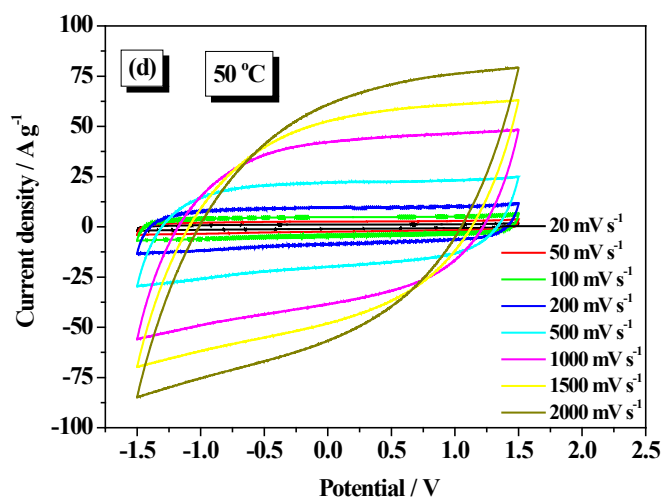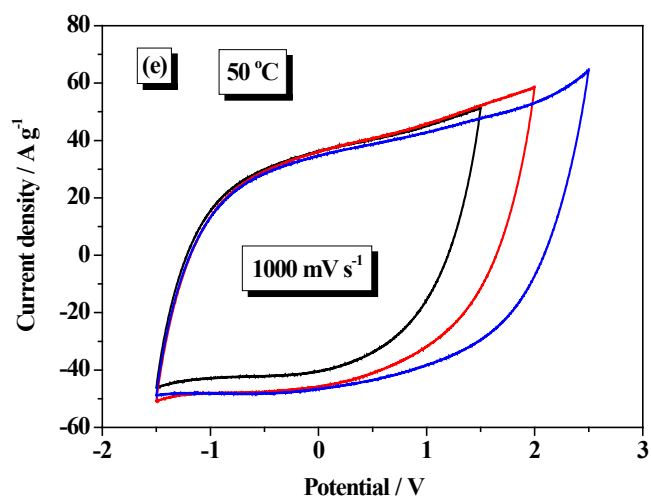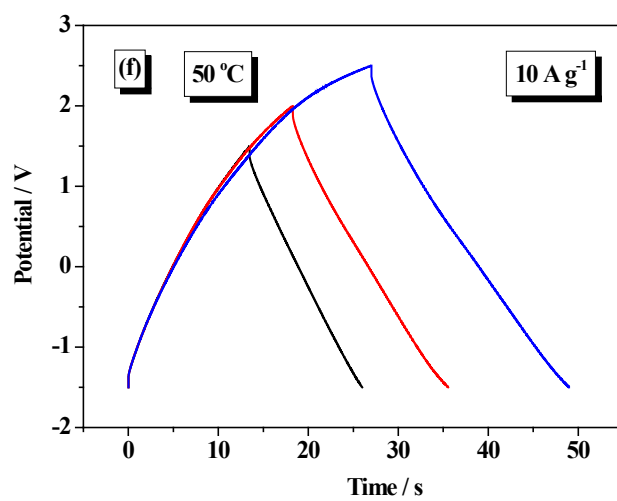

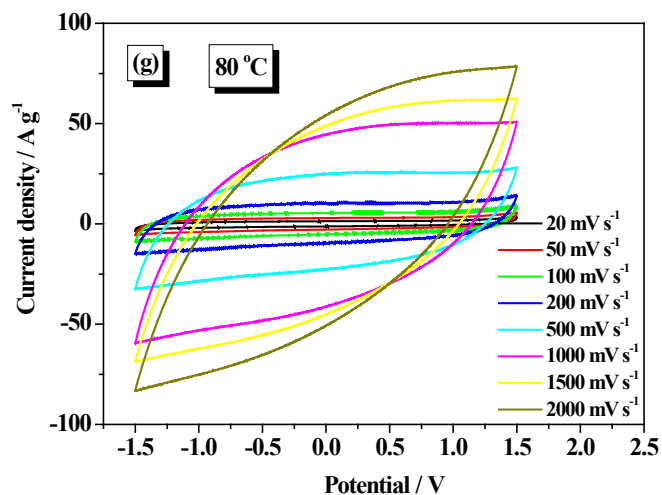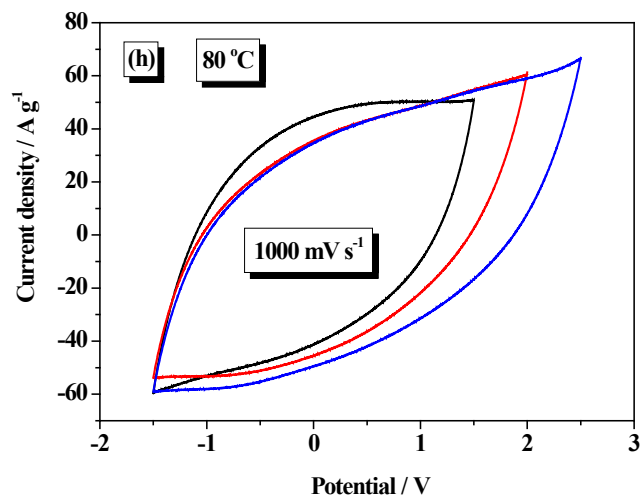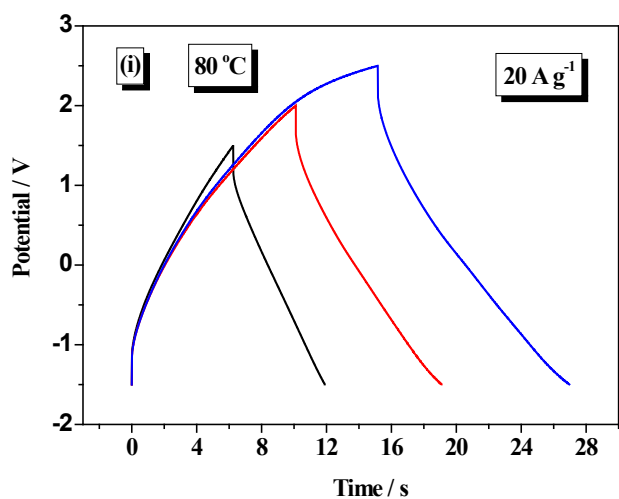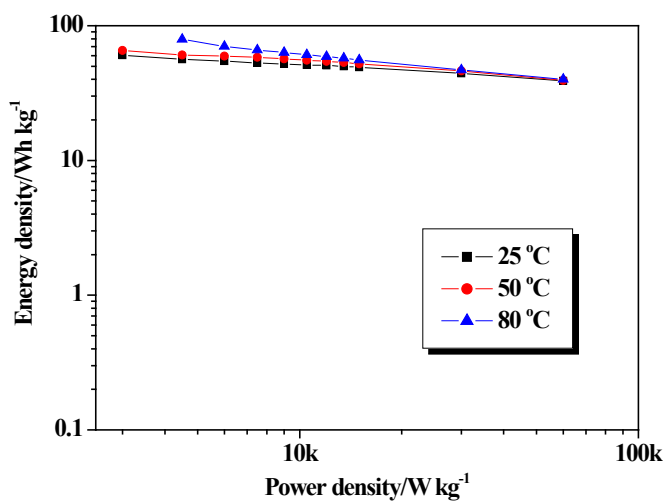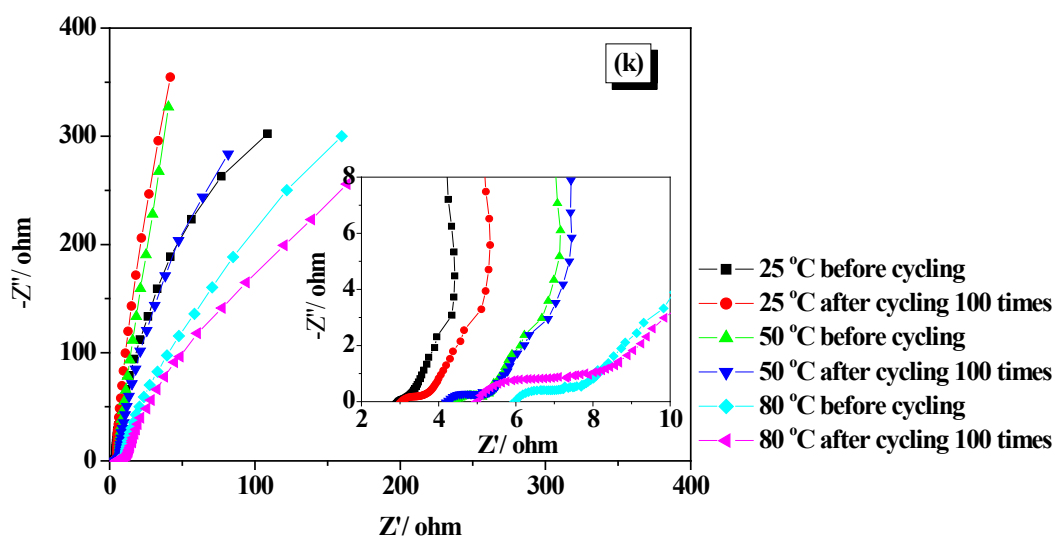



**Fig. S8.** The **carbon-1:2-700** sample measured in a two-electrode system using [EMIm]BF<sub>4</sub>/AN as electrolyte at the operation temperatures of 25/50/80 °C: (a-c) CV curves and galvanostatic charge-discharge curves at 25 °C; (d-f) CV curves and galvanostatic charge-discharge curves at 50 °C; (g-i) CV curves and galvanostatic charge-discharge curves at 80 °C; (j) Ragone plot showing energy density vs. power density at 25/50/80 °C; (k) Nyquist plots before/after 100 cycles, as well as the magnified ones (the inset).
